1  
2  
3  
4  
5  
6  
7  
8  
9  
10  
11  
12  
13  
14  
15  
16  
17  
18  
19  
20  
21  
22  
23  
24  
25  
26  
27  
28  
29  
30

## The 22q11.2 deletion syndrome from a biopsychosocial perspective: an ICF-based approach

Ana Paula Corrêa Cabral<sup>1¶</sup>, Dafne Dain Gandelman Horovitz,<sup>1¶</sup> Lidiane Nogueira Santos<sup>1&</sup>, Amanda Oliveira de Carvalho Carvalho <sup>1&</sup>, Cristina Maria Duarte Wing<sup>2&</sup>, Luciana Castaneda<sup>3¶</sup>, *Liane Simon*<sup>4¶</sup>; Carla Trevisan M. Ribeiro<sup>1#¶\*</sup>

<sup>1</sup> National Institute of Women's, Children's and Adolescents' Health Fernandes Figueiras (*IFF/Fiocruz*), Rio de Janeiro, RJ, Brazil

<sup>2</sup> Federal University of Rio de Janeiro (UFRJ), Rio de Janeiro, RJ, Brazil

<sup>3</sup> Federal Institute of Rio de Janeiro (IFRJ), Rio de Janeiro, RJ, Brazil

<sup>4</sup> MSH Medical School Hamburg, Hamburg, Germany

# Av Rui Barbosa, 716 -Flamengo – Rio de Janeiro/ RJ - Brasil – Zip code: 22250-020 - [carla.ribeiro@fiocruz.br](mailto:carla.ribeiro@fiocruz.br)

\*Corresponding author

Email: [carla.ribeiro@fiocruz.br](mailto:carla.ribeiro@fiocruz.br)

NOTE: This preprint reports new research that has not been certified by peer review and should not be used to guide clinical practice.

¶ These authors contributed equally to this work.

& These authors contributed equally to this work

## 31 **Abstract**

32 **Purpose:** To describe children with 22q11.2 deletion syndrome functioning  
33 from a biopsychosocial perspective, focusing on the impact of children's health  
34 condition from domains to the International Classification of Functioning, Disability  
35 and Health (ICF). **Methods:** A descriptive, cross-sectional case series study with  
36 22q11.2del children. A questionnaire with an ICF checklist for 22q11.2del was  
37 completed using a structured interview. The Test of Childhood Language ABFW  
38 was used to fill in vocabulary, fluency and language pragmatics questions. The  
39 Wechsler Abbreviated Scale of Intelligence (WASI) was used to determine  
40 Intelligence Quotient (IQ). **Results:** Seven participants from 7 to 12 years old,  
41 presented some level of IQ impairment. Observed that 22q11.2del children  
42 experience significant intellectual, cognitive and speech impairment across ICF  
43 Body Function domains. Impairment related to nose and pharynx were found in only  
44 one patient. The most relevant categories considered limitations in Activity and  
45 Participation component were pertained to producing nonverbal messages,  
46 communication, handling stress and social interaction. Family, health professionals  
47 and acquaintances were perceived as facilitators in the component Environmental  
48 Factors. **Conclusion:** Children with 22q11.2del have their functioning affected by  
49 aspects that go beyond medical diagnosis. A checklist base on ICF for functional  
50 profile can contribute to incorporate a biopsychosocial approach.

51 **Keywords:** 22q11.2 deletion syndrome; velo-cardio-facial syndrome; International  
52 Classification of Functioning Disability and Health, Child; functioning.

53

## 54 **Introduction**

55           The 22q11.2 deletion syndrome (22q11.2DS; 22q11.2del) is the most common  
56 microdeletion syndrome in humans. Studies show a frequency of 1:992 for deletions  
57 of 22q11.2 in low risk pregnancies and of 1:2,000 livebirths [1]. Clinical  
58 manifestations of 22q11.2del are highly heterogeneous and can range from mild to  
59 severe, and typically include a congenital heart defect (CHD), velopharyngeal  
60 insufficiency with or without cleft palate, mild to moderate immune impairment,  
61 characteristic facial features, learning disabilities and language difficulties [2].  
62 Impaired cognitive development is present in 70% to 80% of patients, though severe  
63 learning disability is rare [3]. This is in part identified by the presence of reduced  
64 Intelligence Quotient (IQ) scores [4]. In addition, subjects with a 22q11.2DS deletion  
65 show a higher risk for the development of psychiatric problems during adolescence  
66 and early adulthood[5].

67           Furthermore, speech and language difficulties comprise one of the most  
68 distressing aspects for parents of children with 22q11.2DS [2]. Studies have  
69 highlighted that the difficulties in the production of spoken language presented in  
70 del22q11.2 seem to exceed the anatomofunctional alterations of the phono  
71 articulatory organs[6-8], with difficulties being found in more complex tasks such as  
72 in the production of oral narrative, in the task of verbal fluency [9], and other  
73 communication skills [10]. This can have a significant impact on functionality.

74           Despite the prevalence of the syndrome, it frequently goes undiagnosed  
75 because of mild or variable phenotypic expression. Diagnosis can be confirmed by  
76 fluorescence in situ hybridization (FISH), a cytogenetic test which is not available in  
77 many cases due to their high cost. Hence, it is important to identify the common  
78 symptoms as well as the functional domains that may be affected in 22q11.2del  
79 children to diagnose, plan comprehensive evaluations, rehabilitation therapies, and  
80 long-term follow-up [11].

81 In this context, the World Health Organization created the International  
82 Classification of Functioning, Disability and Health (ICF), which serves as a  
83 companion to the International Classification of Diseases in order to characterize  
84 how health-related conditions affect people's lives. The ICF focuses on how context  
85 affects functioning and the level of disability [12]. In this case, "functioning" does not  
86 refer to quantification of ability or symptoms, but rather to how those symptoms  
87 affect an individuals' age-appropriate ability to respond to the demands of daily life.  
88 A biopsychosocial framework for comprehensively describing functioning and  
89 disability that is provided by the ICF may enhance our understanding of the broader  
90 impact of 22q11.2del on the functioning of individual children.

91 Recent research studies have begun to use the ICF to assess children's  
92 functioning status in the context of their health condition [13-16]. Havstam et al. [13]  
93 were the first study for children with cleft lip and palate (CLP) to utilize the ICF to  
94 provide an integrated and comprehensive understanding of CLP and how a  
95 communication disability may emerge. Additionally, studies have applied the  
96 framework of the ICF to consider children's communication [15]. However, to our  
97 knowledge, applications of the ICF related to children with 22q11.2del specifically  
98 are lacking.

99 The ICF framework can provide health professionals not only with the  
100 opportunity to value the positive aspects of functioning, as well as the disability  
101 aspects. Thus, the purpose of this study was to describe children with 22q11.2del  
102 functioning from a biopsychosocial perspective, focusing on the impact of children's  
103 health condition from four major domains of functioning: Body Functions, Body  
104 Structures, Activities, and Participation, and Environmental Factors. The hypothesis  
105 is that these children have their functioning affected by aspects that go beyond  
106 medical diagnosis.

## 107 **Methods**

108 We performed a descriptive, quantitative, cross-sectional case series study with  
109 seven 22q11.2 deletion syndrome children. Patients were recruited from a high-  
110 complexity hospital in Rio de Janeiro, Brazil between February 1<sup>st</sup>, 2019 to February  
111 31<sup>st</sup>, 2020, and they were either inpatients or outpatients. This is a public hospital  
112 which offers multi-professional advice, support and treatment to children and youth  
113 with physical, cognitive and/or psychiatric disabilities. The research protocol  
114 followed the normative guidelines of Resolution No. 466/12 of the National Health  
115 Council of the Brazilian Ministry of Health. Local ethics committee approval was  
116 obtained prior to start (n.2.970.203) and patient data was kept anonymous. The  
117 consent form of all participants was obtained in writing and documented on a  
118 specific form signed by the local Ethics Committee.

119 Participants for this study were children and inclusion criteria for the study were  
120 a positive genetic test, FISH microarray for the 22Q11.2 chromosomal deletion and  
121 age between 6 and 12 years old. The families of all eligible children were contacted  
122 for participation directly in the clinic by phone or by mail. The study participants were  
123 invited consecutively to the clinic at the times when the investigator was present.  
124 Parents' informed consent was obtained and signed in person by them and the  
125 researcher before the assessments. Children between 6 and 12 years old also  
126 signed in person, together with the researchers and their parents, a free and  
127 informed consent form.

128 The most common impairments of 22q11.2del children were explored using the  
129 ICF checklist developed in a previous study [16]. A questionnaire with this checklist  
130 for 22q11.2del was completed using a structured interview with the children and  
131 parents by the investigator's direct observations, and by information retrieved from  
132 medical records. All participants and their parents were interviewed by health

133 professionals trained in the principles of the ICF. Before an interview started, each  
134 patient's medical record sheet was checked and relevant information on socio-  
135 demographic variables and diagnoses were extracted. The participants were also  
136 instructed to bring updated medical reports and exam results to the interview for  
137 additional information. The data was collected by using a patient profile  
138 questionnaire containing demographic information, medical diagnoses, and  
139 information about other health-related issues, which were recorded using a patient  
140 profile questionnaire.

141 Impairment in 23 items from the Body Functions component and nine from the  
142 Body Structure component were investigated by using the ICF checklist for  
143 22q11.2del. We also checked limitations in 44 items from the Activities and  
144 Participation component and assessed as barriers or facilitators 28 items from the  
145 Environmental Factors component [16].

146 The answers from the study population were considered as absolute  
147 frequencies of impairments/limitations for the ICF components Body Functions,  
148 Body Structures and Activities and Participation. As for the Environmental Factors,  
149 absolute frequencies of categories were named to be facilitator or barrier. The ICF  
150 categories considered not applicable by the participants were marked as "not  
151 relevant/not applicable".

152 The Test of Childhood language ABFW was used only to fill in vocabulary,  
153 fluency and language pragmatics questions in the ICF checklist [17]. We performed  
154 an adapted version of the Portuguese Wechsler Abbreviated Scale of Intelligence  
155 (WASI)[18 to determine the full-scale, verbal and performance IQ of the children.  
156 WASI is a brief instrument used to assess people's intellectual ability from 6 to 89  
157 years old. It consists of four subtests, two of which are part of a verbal scale  
158 (Vocabulary and Similarities), and two of which are part of a performance scale

159 (Block Design and Matrix Reasoning). The scale was performed by a trained  
160 psychologist at a previous scheduled time, and it took around forty minutes. Age-  
161 adjusted scores were derived and transformed to a score using norms available for  
162 each measure. These scores are already age-standardized, where higher scores  
163 indicate better performance.

164 Data was collected manually initially, and then entered, organized, and  
165 analyzed using Epi Info software version 7.0. Following that, the data was exported  
166 and descriptive statistics (frequency, percentage, mean) were used to describe the  
167 studied variables.

## 168 **Results**

169 Our analyses revealed that five out of seven of them were boys; only one  
170 subject presented with a hearing loss diagnosis; and the population age was from  
171 7 to 12 years old with a mean of 10.28 and a std. deviation of 2.05 (Table 1). The  
172 IQ was assessed using WASI by measuring the verbal IQ (VIQ), performance IQ  
173 (PIQ) and general cognition full-scale (FSIQ). Table 1 shows the mean performance  
174 on WASI scores and comparison of means between participants. Cognitive  
175 assessment was completed for six of the seven patients enrolled in the study. Due  
176 to scheduling in a different day from the ICF questionnaire application, cognitive  
177 assessments were not performed in one patient, who did not reply to phone calls,  
178 mails, or text messages; after a period of ten months without any contact the  
179 participant was excluded from cognitive testing. We identified that all subjects  
180 presented with IQ impairment. In the verbal IQ, one child had an average IQ, one  
181 had a low average intellectual disability, two had an IQ in the borderline range, and  
182 two had an extremely low verbal IQ. As for the performance IQ, two children had a  
183 low average, three had a borderline range, and one had an extremely low  
184 performance IQ. Finally, in the full-scale IQ, two children had low average IQ, one

185 had an IQ in the borderline range, and three had an extremely low full-scale IQ. In  
 186 sum, we found that children with 22q11.2del had significant deficits across all  
 187 cognitive measures: full scale IQ, verbal IQ, and performance IQ scores.

188

189 **Table 1- Demographic characteristics of 22q11.2DS children**  
 190

| Population Profile        |                | n      |
|---------------------------|----------------|--------|
| Age                       | Mean           | 10,28* |
|                           | Std. deviation | 2,05*  |
| Gender                    | Female         | 2      |
|                           | Male           | 5      |
| 22q2.1del (FISH)          | Yes            | 7      |
| Hearing loss              | Yes            | 1      |
|                           | No             | 6      |
| WASI Verbal IQ (VIQ)      | Average        | 1      |
|                           | Low Average    | 1      |
|                           | Borderline     | 2      |
|                           | Extremely Low  | 2      |
| WASI Performance IQ (PIQ) | Borderline     | 3      |
|                           | Low Average    | 2      |
|                           | Extremely Low  | 1      |
| WASI Full Scale IQ (FSIQ) | Borderline     | 1      |
|                           | Low Average    | 2      |
|                           | Extremely Low  | 3      |

191 \*age=numbers related to the mean and standard deviation from all subjects (n)=  
 192 total number of subjects  
 193 Source: the author, 2022

194

195 At the level of Body Functions and Structures, we identified that impairment  
 196 related to nose and pharynx were found in only one patient, and none of the children  
 197 presented with external ear structure impairment. We observed that 22q11.2del  
 198 children experience significant intellectual, cognitive and speech impairment across  
 199 ICF Body Function domains (Table 2). This is especially identified in the items  
 200 related to fluency and rhythm of speech and intellectual functions, where we had  
 201 the highest number for confirmed impairment (n=5). Further, areas related to  
 202 personality also showed to affect four out of seven children.

203 **Table 2 - Body Structures and Functions in children with 22q11.2del**



| Categories                                    | Impairment  |             | Not evaluated/<br>Not applicable |
|-----------------------------------------------|-------------|-------------|----------------------------------|
|                                               | Yes         | No          |                                  |
| <b>Body Structures</b>                        |             |             |                                  |
| Structure of brain (s110)                     | -           | 4 (57,14%)  | 3 (42,86%)                       |
| Structure of external ear (s240)              | -           | 7 (100,00%) | -                                |
| Structure of middle ear (s250)                | -           | 6 (85,71%)  | 1 (14,29%)                       |
| Structure of inner ear (s260)                 | -           | 6 (85,71%)  | 1 (14,29%)                       |
| Structure of nose (s310)                      | 1 (14,29%)  | 5 (71,43%)  | 1 (14,29%)                       |
| Structure of mouth (s320)                     | -           | 4 (57,14%)  | 3 (42,86%)                       |
| Structure of pharynx (s330)                   | 1 (14,29%)  | 4 (57,14%)  | 2 (28,57%)                       |
| Structure of larynx (s340)                    | -           | 5 (71,43%)  | 2 (28,57%)                       |
| Structure of head and neck region (s710)      | -           | 7 (100,00%) | -                                |
| <b>Body Functions</b>                         |             |             |                                  |
| Consciousness functions (b110)                | 1 (14,29%)  | 6 (85,71%)  | -                                |
| Orientation functions (b114)                  | -           | 7 (100,00%) | -                                |
| Intellectual functions (b117)                 | 5 (71,43%)  | 1 (14,29%)  | 1 (14,29%)                       |
| Global psychosocial functions (b122)          | -           | 7 (100,00%) | -                                |
| Temperament and personality functions (b126)  | 4 (57,14%)  | 1 (14,29%)  | 2 (28,57%)                       |
| Energy and drive functions (b130)             | -           | 7 (100,00%) | -                                |
| Attention functions (b140)                    | -           | 7 (100,00%) | -                                |
| Memory functions (b144)                       | 1 (14,29%)  | 6 (85,71%)  | -                                |
| Psychomotor functions (b147)                  | -           | 7 (100,00%) | -                                |
| Emotional functions (b152)                    | -           | 7 (100,00%) | -                                |
| Perceptual functions (b156)                   | 2 (28,57%)  | 5 (71,43%)  | -                                |
| Thought functions (b160)                      | 3 (42,86%)  | 4 (57,14%)  | -                                |
| Higher-level cognitive functions (b164)       | 2 (28,57%)  | 5 (71,43%)  | -                                |
| Mental functions of language (b167)           | -           | 7 (100,00%) | -                                |
| Calculation functions (b172)                  | 1 (14,29%)  | 6 (85,71%)  | -                                |
| Experience of self and time functions (b180)  | -           | 7 (100,00%) | -                                |
| Hearing functions (b230)                      | 1 (14,29%)  | 6 (85,71%)  | -                                |
| Voice functions (b310)                        | 1 (14,29%)  | 6 (85,71%)  | -                                |
| Articulation functions (b320)                 | 7 (100,00%) | -           | -                                |
| Fluency and rhythm of speech functions (b330) | 5 (71,43%)  | 2 (28,57%)  | -                                |
| Alternative vocalization functions (b340)     | 1 (14,29%)  | 6 (85,71%)  | -                                |
| Respiration functions (b440)                  | 1 (14,29%)  | 6 (85,71%)  | -                                |
| Muscle tone functions (b735)                  | -           | 7 (100,00%) | -                                |

204 **Source:** the author, 2022

205 We also observed that all participants presented with a major limitation/  
 206 restriction related to Activity and Participation in producing nonverbal messages  
 207 (table 3). Other restrictions for the children were related to communication and  
 208 social interaction, where the majority of them (four or more children) showed to have

209 participation limitations. Items such as community life, complex interpersonal  
 210 interactions, abilities to discuss, having a conversation, communicating with written  
 211 and spoken messages, as well as in writing, reading, thinking were also pointed out  
 212 as limitations for the study population (table 3).

213

214 **Table 3 – Activity and Participation of children with 22q11.2del**

| Categories                                                            | Limitation / Restriction |             | Not evaluated/N ot applicable |
|-----------------------------------------------------------------------|--------------------------|-------------|-------------------------------|
|                                                                       | Yes                      | No          |                               |
| Watching (d110)                                                       | -                        | 7 (100,00%) | -                             |
| Listening (d115)                                                      | -                        | 7 (100,00%) | -                             |
| Other purposeful sensing (d120)                                       | -                        | 7 (100,00%) | -                             |
| Copying (d130)                                                        | -                        | 7 (100,00%) | -                             |
| Rehearsing (d135)                                                     | 1 (14,29%)               | 6 (85,71%)  | -                             |
| Learning to read (d140)                                               | 3 (42,86%)               | 4 (57,14%)  | -                             |
| Learning to write (d145)                                              | 3 (42,86%)               | 4 (57,14%)  | -                             |
| Learning to calculate (d150)                                          | 2 (28,57%)               | 5 (71,43%)  | -                             |
| Acquiring skills (d155)                                               | 1 (14,29%)               | 6 (85,71%)  | -                             |
| Focusing attention (d160)                                             | 5 (71,43%)               | 2 (28,57%)  | -                             |
| Thinking (d163)                                                       | 5 (71,43%)               | 2 (28,57%)  | -                             |
| Reading (d166)                                                        | 5 (71,43%)               | 2 (28,57%)  | -                             |
| Writing (d170)                                                        | 5 (71,43%)               | 2 (28,57%)  | -                             |
| Calculating (d172)                                                    | 2 (28,57%)               | 4 (57,14%)  | 1 (14,29%)                    |
| Solving problems (d17)                                                | 4 (57,14%)               | 2 (28,57%)  | 1 (14,29%)                    |
| Making decisions (d177)                                               | 3 (42,86%)               | 4 (57,14%)  | -                             |
| Undertaking a single task (d210)                                      | 3 (42,86%)               | 4 (57,14%)  | -                             |
| Undertaking multiple tasks (d220)                                     | 5 (71,43%)               | 2 (28,57%)  | -                             |
| Handling stress and other psych (d240)                                | 4 (57,14%)               | 3 (42,86%)  | -                             |
| Communicating with - receiving - spoken messages (d310)               | 4 (57,14%)               | 3 (42,86%)  | -                             |
| Communicating with - receiving - nonverbal messages (d315)            | 1 (14,29%)               | 6 (85,71%)  | -                             |
| Communicating with - receiving - formal sign language messages (d320) | 2 (28,57%)               | 5 (71,43%)  | -                             |
| Communicating with - receiving - written messages (d325)              | 5 (71,43%)               | 2 (28,57%)  | -                             |
| Speaking (d330)                                                       | 2 (28,57%)               | 5 (71,43%)  | -                             |
| Producing nonverbal messages (d335)                                   | 7 (100,00%)              | -           | -                             |
| Producing messages in formal sign language (d340)                     | 4 (57,14%)               | 3 (42,86%)  | -                             |
| Writing messages (d345)                                               | 3 (42,86%)               | 4 (57,14%)  | -                             |
| Conversation (d350)                                                   | 4 (57,14%)               | 3 (42,86%)  | -                             |
| Discussion (d355)                                                     | 5 (71,43%)               | 2 (28,57%)  | -                             |
| Using communication devices and techniques (d360)                     | 1 (14,29%)               | 6 (85,71%)  | -                             |
| Using transportation (d470)                                           | 1 (14,29%)               | 5 (71,43%)  | 1 (14,29%)                    |
| Acquisition of goods and services (d620)                              | 1 (14,29%)               | 5 (71,43%)  | 1 (14,29%)                    |
| Basic interpersonal interactions (d710)                               | 3 (42,86%)               | 4 (57,14%)  | -                             |
| Complex interpersonal interactions (d720)                             | 4 (57,14%)               | 3 (42,86%)  | -                             |
| Formal relationships (d740)                                           | 2 (28,57%)               | 5 (71,43%)  | -                             |

|                                      |            |            |   |
|--------------------------------------|------------|------------|---|
| Informal social relationships (d750) | 1 (14,29%) | 6 (85,71%) | - |
| Family relationships (d760)          | 1 (14,29%) | 6 (85,71%) | - |
| Informal education (d810)            | 4 (57,14%) | 3 (42,86%) | - |
| Preschool education (d815)           | 1 (14,29%) | 6 (85,71%) | - |
| School education (d820)              | 2 (28,57%) | 5 (71,43%) | - |
| Basic economic transactions (d860)   | 2 (28,57%) | 5 (71,43%) | - |
| Community life (d910)                | 4 (57,14%) | 3 (42,86%) | - |
| Recreation and leisure (d920)        | 1 (14,29%) | 6 (85,71%) | - |
| Human rights (d940)                  | 3 (42,86%) | 4 (57,14%) | - |

215

**Source:** the author, 202

216 Furthermore, we investigated which Environmental Factors related to the  
 217 physical, social and attitudinal environment in which people live and conduct their  
 218 lives might be facilitators or barriers to children’s functioning. Within the ICF  
 219 checklist related to children with 22q11.2del, we found that the Environmental  
 220 Factors that were considered facilitators for all participants were their immediate  
 221 family (e310), transportation services, systems, and policies (e540), utility  
 222 services, systems and policies (e530), media services, and systems and policies  
 223 (e560) (Table 4). Most of the participants (5 out of 7) also considered facilitators  
 224 their extended family (e315), acquaintances, peers’ colleagues, neighbors, and  
 225 community members (e325), as well as personal care providers and personal  
 226 assistants (e340), health professionals (e355), individual attitudes of immediate  
 227 family members (e410) and communication services, systems and policies  
 228 (e535) (Table 4).

229 We also identified Environmental Factors related to the use of products, none  
 230 of the participants make use of products and technology for personal use in daily  
 231 living (e115), only one participant reported use of products and technology for  
 232 culture and recreation (e140), two reported use of products for communication  
 233 (e125), and five children use products and technology for education (e130) (data  
 234 not shown) (table 4).

235 **Table 4 – Environmental Factors related to children with 22q11.2del**

| Categories              | Facilitator |            | Not evaluated/N ot applicable |
|-------------------------|-------------|------------|-------------------------------|
|                         | Yes         | No         |                               |
| Immediate family (e310) | 7 (100,00%) | -          | -                             |
| Extended family (e315)  | 5 (71,43%)  | 2 (28,57%) | -                             |

|                                                                                                  |             |            |            |
|--------------------------------------------------------------------------------------------------|-------------|------------|------------|
| Friends (e320)                                                                                   | 2 (28,57%)  | 5 (71,43%) | -          |
| Acquaintances, peers colleagues, neighbours and community members (e325)                         | 5 (71,43%)  | 2 (28,57%) | -          |
| Personal care providers and personal assistants (e340)                                           | 5 (71,43%)  | 2 (28,57%) | -          |
| Domesticated animals (e350)                                                                      | 3 (42,86%)  | 4 (57,14%) | -          |
| Health professionals (e355)                                                                      | 5 (71,43%)  | 2 (28,57%) | -          |
| Health-related professionals (e360)                                                              | 4 (57,14%)  | 3 (42,86%) | -          |
| Individual attitudes of immediate family members (e410)                                          | 5 (71,43%)  | 2 (28,57%) | -          |
| Individual attitudes of extended family members (e415)                                           | 3 (42,86%)  | 3 (42,86%) | 1 (14,29%) |
| Individual attitudes of friends (e420)                                                           | 2 (28,57%)  | 4 (57,14%) | 1 (14,29%) |
| Individual attitudes of acquaintances, peers colleagues, neighbours and community members (e425) | 3 (42,86%)  | 4 (57,14%) | -          |
| Individual attitudes of personal care providers and personal assistants (e440)                   | -           | 6 (85,71%) | 1 (14,29%) |
| Individual attitudes of health professionals (e450)                                              | -           | 6 (85,71%) | 1 (14,29%) |
| Individual attitudes of health-related professionals (e455)                                      | -           | 6 (85,71%) | 1 (14,29%) |
| Societal attitudes (e460)                                                                        | 1 (14,29%)  | 5 (71,43%) | 1 (14,29%) |
| Utilities services, systems and policies (e530)                                                  | 7 (100,00%) | -          | -          |
| Communication services, systems and policies (e535)                                              | 5 (71,43%)  | 2 (28,57%) | -          |
| Transportation services, systems and policies (e540)                                             | 7 (100,00%) | -          | -          |
| Associations and organizational services, systems and policies (e555)                            | 4 (57,14%)  | 3 (42,86%) | -          |
| Media services, systems and policies (e560)                                                      | 7 (100,00%) | -          | -          |
| Social security services, systems and policies (e570)                                            | 3 (42,86%)  | 4 (57,14%) | -          |
| General social support services, systems and policies (e575)                                     | -           | 6 (85,71%) | 1 (14,29%) |
| Health services, systems and policies (e580)                                                     | 4 (57,14%)  | 3 (42,86%) | -          |

236

**Source:** the author, 2022

237

The main findings (over than 45%) related to the functionality of children and

238

adolescents with 22q11.2del are described in fig 1.

239

**Fig 1 – Main findings related to the functionality of children and adolescents**

240

**with 22q11.2del**

241

242

## 243 Discussion

244 Our findings point out that all four components of the ICF (Body Functions,  
245 Body Structures, Activities and Participation, and Environmental Factors) are  
246 relevant for children with 22q11.2del, confirming the hypothesis is that these  
247 children have their functioning affected by aspects that go beyond medical  
248 diagnosis. According to the ICF, impairments are defined as problems in body  
249 function or structure. All the variables in this study relating voice and speech to  
250 articulation functions, alternative vocalization functions, fluency and rhythm  
251 functions are by definition impairments of Body Functions. In agreement, it has  
252 been described speech and language disorders in the school aged years such  
253 as hypernasality and voice disorders, as well as language impairments related to  
254 difficulties with narrative and descriptive language [11,19], which goes along with  
255 the findings in our study where fluency and rhythm functions were considered  
256 impaired for 5 out of the 7 children interviewed.

257 Moreover, we found that mental functions were also significantly affected in  
258 the children with 22q11.2del, items related to intellectual functions, thought  
259 functions, perceptual functions, higher-level cognitive functions, temperament,  
260 and personality functions were the most frequently impaired. General mental  
261 functions constitute the way the individual reacts in a particular way to situations,  
262 including the set of mental characteristics that makes the individual distinct from  
263 others [12]. During the interview, 4 children demonstrated variation in emotional  
264 reactivity; such behavior was also emphasized by the parents as being frequent  
265 in daily routine as they answered the checklist. Our findings are of great  
266 importance because impairments in mental functions can signalize risk factors  
267 for developing psychiatric disorders. A previous study found similar results when

268 they described 22q11.2del children temperament to be moderately difficult [20].  
269 In line with this, other studies described children with 22q11.2del at increased risk  
270 for psychiatric disorders throughout development, especially attention-  
271 deficit/hyperactivity disorder (ADHD), anxiety and affective disorders, psychosis,  
272 and schizophrenia spectrum disorders [21]. In accordance with our findings,  
273 perceptual functions impairment were also found in another study where they  
274 reported that 22q11del children were significantly slower to recognize happiness,  
275 sadness, and anger (but not fear) on a dynamic emotion task, compared to other  
276 children [22]. Such behaviors should be considered since psychiatric disorders  
277 are among the most common manifestations of 22q11del and diagnoses  
278 characteristically prevalent in childhood include ADHD (30–40%), anxiety (30–  
279 40%) and mood (20–30%) disorders, which increase in prevalence during  
280 adolescence [22].

281 Body Structures impairments were found only in 2 participants, both related  
282 to structures involved in voice and speech. This could be related to the specific  
283 speech and language disorders that continue into the school aged years [11, 23].  
284 However, the data of the patients in our study are not in line with previous  
285 qualitative research when it comes to impairments in Body Structures. In the  
286 latter, patients experienced more problems than in this present research. This  
287 could be due to a lack of clinical reports on patient's records and long waiting lists  
288 did not make needed and/or new evaluations possible, therefore, in our research,  
289 health professionals rated the patients in the Body Structures category according  
290 to the medical and professional reports available at the moment, as  
291 recommended by the ICF manual [10], therefore complementary exams to fully  
292 assess the items from the Body Structures from the ICF checklist for 22q11.2del

293 was not possible and could have impacted the Body Structures impairments  
294 assessment. Thus, we cannot confirm the instrument reliability for Body  
295 Structures, because the few number of patients having some classifiable  
296 impairment in those components prevents a meaningful analysis.

297 The ICF focuses on how context affects function. “Functioning” does not refer  
298 to quantification of symptoms, but rather to how those symptoms affect  
299 individuals’ ability to respond to demands of daily life. These domains are related,  
300 but independent, the presence of below-average cognitive abilities does not  
301 necessarily confer low function, therefore the IQ assessed using the Wechsler  
302 Abbreviated Scale of Intelligence (WASI) from which full-scale IQ (FSIQ), verbal  
303 IQ (VIQ) and performance IQ (PIQ) was of great worth for understanding  
304 22q11.2del children’s functioning. The level of intelligence in children and  
305 adolescents with 22q11.2 deletion syndrome is highly variable [24]. In our study  
306 we found that in the FSIQ all children had significant deficit, and 4 out of the 6  
307 children assessed presented with a FSIQ below 70. While divergent cognitive  
308 trajectories across age has been reported [25], others suggest some cognitive  
309 decline for most 22q11del individuals as they grow into adulthood [26]. This goes  
310 in accordance with previous findings where approximately 50% of individuals with  
311 22q11.2del had intellectual disability (ID), defined by an IQ score of less than 70  
312 [27].

313 Although the intelligence profile is highly variable in 22q11.2del children,  
314 examination of sub-scale scores on the WASI revealed that 4 out of the 6 children  
315 had lower VIQ scores compared to PIQ scores. Although the magnitude of the  
316 difference on average is variable (from 1 to 19 IQ points), it may be worth  
317 investigating in future studies if some individuals perhaps speak less or if some



318 aspect of verbal communication is diminished by transmission. These results  
319 were also described where a subgroup of children with 22q11.2del during early  
320 primary school age showed a discrepancy between verbal abilities and  
321 perceptual reasoning abilities, favoring the verbal domain [28].

322 The most relevant categories considered limitations in Activity and  
323 Participation component were pertained to producing nonverbal messages,  
324 communication, handling stress and social interaction. Because verbal  
325 communication is a major contributor to the foundation of a person's identity and  
326 their social validation, disruptions in one's speech may result in decreased self-  
327 concept. Decrements in self-esteem, in turn, may contribute to feelings of  
328 uneasiness during verbal exchanges in social settings [29]. These results indicate  
329 a correlation with our findings in Body Structures and Functions, where speech  
330 difficulties of children with 22q11.2del were also relevant categories and can  
331 potentially be associated with psychological or emotional problems including  
332 difficulties with self-esteem, depression, and anxiety [30].

333 In addition, categories related to the learning process, such as reading,  
334 writing, thinking, and focusing attention, were also recorded as a limitation for  
335 most of the children. These findings are also described in the literature, where  
336 learning disabilities and academic achievement difficulties, as well as deficits in  
337 attention and concentration are reported in children with 22q11.2del [9]. In sum,  
338 we see that disruption to the Body Functions and Structures of children with  
339 22q11.2del is but one component of functioning as described by the ICF. The  
340 interrelated nature of the ICF components suggest that the functioning and  
341 disability of an individual emerges from the interaction of one's Body Functions  
342 and Structures with other components of the ICF such as Activity and

343 Participation [12] and this examination of all interactions is necessary for a  
344 complete description of functioning in children with 22q11.2del.

345 Family, health professionals and acquaintances were perceived as  
346 facilitators for the 22q11.2del children in the component Environmental Factors.  
347 For more than half of the participants health services, systems and policies were  
348 also important facilitators. This emphasizes the importance of children's social  
349 network and the influence of a good relationship with health professionals.  
350 Although there is a reasonable body of literature describing the IQ, achievement,  
351 neurocognitive and behavior abnormalities in children with 22q11del [3,27], there  
352 is a lack of published studies that have assessed the role of the environment in  
353 functioning in these domains.

354 Report of use of products were not relevant for this study population, one  
355 participant reported to use products and technology for culture and recreation,  
356 two reported use of products for communication, and 5 children use products and  
357 technology for education, this category contains items like calculator, which was  
358 the item cited by all 5 participants. It remains unclear the role of other products  
359 and its use since studies that correlate specific environmental factors from the  
360 ICF and the 22q11.2del children were not found in the literature.

361 Studies in general only highlight the deficiencies of structure and function,  
362 according to a biomedical approach that is now outdated. The current focus of  
363 healthcare, whether clinical or rehabilitation, should be directed towards activity  
364 and participation from a biopsychosocial perspective. The use of the ICF can lead  
365 to this direction as it considers the subject in its fullest and beyond the health  
366 condition itself. Functioning of 22q11.2 deletion syndrome children is an  
367 important factor that affects their activity, participation, and quality of life. Although

368 this is a case-series study, thus limiting its generalizability to larger populations  
369 of patients, this study can also provide information that allows hypotheses to  
370 develop, leading to further advanced studies. An ICF based checklist approach,  
371 such as the one used in this research, can be used to identify common profiles  
372 of functioning, activities, participation, and environment of 22q11.2 child  
373 population. The value of using the ICF in the assessment of children with  
374 22q11.2del is that it enables the health professionals to focus on what should be  
375 the goal of intervention: improvement of the child's functioning.

376 The findings from our experience on the applicability of an ICF checklist for  
377 22q11.2del shows that ways of operationalizing the ICF can contribute to  
378 overcome the biomedical perspective, creating possibilities to incorporate a  
379 biopsychosocial approach into the healthcare routine. However, one limitation on  
380 our study was that some questions used in the ICF questionnaire for 22q11.2del  
381 were not completely clear to the parents, and a previous explanation was needed  
382 for better understanding. This should be taken into consideration for improvement  
383 in future studies. One limiting factor for this study is also the sample size of 7. In  
384 order to draw stronger conclusions, a larger sample size is required. We justify  
385 the sample size of the study with the relatively rare nature of 22qdel and the  
386 difficulty in recruiting active participants.

387 Another limitation of the present study is that the clinical records were not  
388 enough to evaluate Body Structure and Function, and further evaluation was not  
389 always possible. This means that the prevalence of impairments in Body Function  
390 and Structure might have been underestimated. Rehabilitation based on the ICF  
391 approach focus on a humanized healthcare, where planning interventions are  
392 centered in the interaction between an individual's health conditions,

393 environmental factors and individual factors, designed to remove barriers in  
394 several contexts. Therefore, further studies on Body Structure and Function  
395 related to Activity and Participation according to the ICF will clarify the impact and  
396 impairments of 22q11.2del in children's functioning.

397

## 398 **Conclusion**

399 Our findings show that children have their functioning affected by aspects  
400 that go beyond body Functions and Structures describe in medical diagnosis.  
401 Relevant categories related to Activity and Participation limitations were  
402 observed, especially in the production of non-verbal messages, communication,  
403 stress management and social interaction. Incorporating a biopsychosocial  
404 approach is important to expend the assessment of children with 22q11.2del.

405 This is the first study to use ICF for functional profile of 22q11.2del children  
406 and adolescent, therefore, this study represents the first stage in the development  
407 of an ICF Core Set in 22q11.2del, hoping that it could be a practical tool to give  
408 insight into the wider determinants of the 22q11.2 population and be used in  
409 public health and social policy to help address inequalities within the child  
410 population. Our experience represents a strong stimulus for extending our  
411 sample and verifying the results obtained in this preliminary experience to have  
412 a full profile of 22q11.2del functioning based on the ICF. Moreover, our results  
413 show that the ICF checklist for children with 22q11.2del fulfils the requirement of  
414 a useful, reliable, and valid multidimensional framework for defining domains and  
415 describing functioning in children aged 7–12 years.

416

## 417 **Acknowledgments**

418 The authors would like to acknowledge the generous support of the Oswaldo  
419 Cruz Foundation, Deutscher Akademischer Austauschdienst (DAAD) and  
420 Medical School Hamburg.

421 **Financial support:** IFF/Fiocruz (PIBIC 09412); Deutscher Akademischer  
422 Austauschdienst - DAAD (57440919)

423

## 424 **References**

425

- 426 1. McDonald-McGinn DM, Sullivan KE, Marino B, Philip N, Swillen A,  
427 Vorstman JAS, et al. 22q11.2 deletion syndrome. *Nat Rev Dis Primer.*  
428 2015;1:15071.
- 429 2. Kobrynski LJ, Sullivan KE. Velocardiofacial syndrome, DiGeorge  
430 syndrome: the chromosome 22q11.2 deletion syndromes. *Lancet Lond*
- 431 3. De Smedt B, Swillen A, Ghesquière P, Devriendt K, Fryns JP. Pre-  
432 academic and early academic achievement in children with velocardiofacial  
433 syndrome (del22q11.2) of borderline or normal intelligence. *Genet Couns*  
434 Geneva Switz. 2003;14(1):15–29.
- 435 4. Óskarsdóttir S, Belfrage M, Sandstedt E, Viggedal G, Uvebrant P.  
436 Disabilities and cognition in children and adolescents with 22q11 deletion  
437 syndrome. *Dev Med Child Neurol.* 2005;47(3):177–84.
- 438 5. Shprintzen RJ. Velo-cardio-facial syndrome: a distinctive behavioral  
439 phenotype [Internet]. *MRDD Research Reviews*; 2000. Disponível em:  
440 [https://onlinelibrary.wiley.com/doi/10.1002/1098-](https://onlinelibrary.wiley.com/doi/10.1002/1098-2779(2000)6:2%3C142::AID-MRDD9%3E3.0.CO;2-H)  
441 [2779\(2000\)6:2%3C142::AID-MRDD9%3E3.0.CO;2-H](https://onlinelibrary.wiley.com/doi/10.1002/1098-2779(2000)6:2%3C142::AID-MRDD9%3E3.0.CO;2-H)
- 442 6. Jacobson C, Shearer J, Habel A, Kane F, Tsakanikos E, Kravariti E. Core  
443 neuropsychological characteristics of children and adolescents with  
444 22q11.2 deletion: Cognitive deficits in 22q11.2 deletion syndrome. *J*  
445 *Intellect Disabil Res.* 2010 Jun 17;54(8):701–13.
- 446 7. Moss EM, Batshaw ML, Solot CB, Gerdes M, McDonald-McGinn DM, Driscoll  
447 DA, et al. Psychoeducational profile of the 22q11.2 microdeletion: A  
448 complex pattern. *J Pediatr.* 1999 Feb;134(2):193–8.
- 449 8. Scherer NJ, D’Antonio LL, Kalbfleisch JH. Early speech and language  
450 development in children with velocardiofacial syndrome. *Am J Med Genet.*  
451 1999 Dec 15;88(6):714–23.
- 452 9. Persson C, Niklasson L, Óskarsdóttir S, Johansson S, Jönsson R, Söderpalm  
453 E. Language skills in 5–8-year-old children with 22q11 deletion syndrome.  
454 *Int J Lang Commun Disord.* 2006 Jan;41(3):313–33

- 455 10. Freire T, Gonçalves T dos S, Moretti CN, Tabaquim M de LM, Crenitte PAP.  
456 Desempenho nas habilidades subjacentes a aprendizagem em um caso de  
457 Síndrome Velocardiofacial. *Distúrbios Comun.* 2015 Jun;27(2):237–47.
- 458 11. Cancrini C, Puliafito P, Digilio MC, Soresina A, Martino S, Rondelli R, et al.  
459 Clinical Features and Follow-Up in Patients with 22q11.2 Deletion  
460 Syndrome. *J Pediatr.* 2014 Jun;164(6):1475-1480.e2
- 461 12. World Health Organization, organizador. International classification of  
462 functioning, disability and health: ICF. Geneva: World Health Organization;  
463 2001. 299 p.
- 464 13. Havstam C, Sandberg AD, Lohmander A. Communication attitude and  
465 speech in 10-year-old children with cleft (lip and) palate: An ICF  
466 perspective. *Int J Speech Lang Pathol.* 2011;13(2):156–64.
- 467 14. Deckers SR, Van Zaalen Y, Stoep J, Van Balkom H, Verhoeven L.  
468 Communication performance of children with Down Syndrome: An ICF-CY  
469 based multiple case study. *Child Lang Teach Ther.* 2016;32(3):293–311.
- 470 15. Westby C. Application of the ICF in Children with Language Impairments.  
471 *Semin Speech Lang.* 2007;28(4):265–72.
- 472 16. Corrêa APC, Ribeiro CTM, Horovitz DDG, Ribeiro LC. Identification of  
473 relevant International Classification of Functioning Disability and Health  
474 (ICF) categories in patients with 22q11.2 Deletion Syndrome: a Delphi  
475 exercise. *CoDAS.* 2020;32(6):e20190158.
- 476 17. ANDRADE, C. R. F. DE et al. ABFW: teste de linguagem infantil nas áreas  
477 de fonologia, vocabulário, fluência e pragmática. Barueri: Pró-Fono, 2004
- 478 18. Trentini, C.M., Yates, D. B., & Heck, V. S. Escala de Inteligência Wechsler  
479 Abreviada (WASI): Manual profissional [Internet]. São Paulo: Casa do  
480 Psicólogo; 2014. 488 p. Disponível em:  
481 [https://www.pearsonclinical.com.br/escala-wechsler-abreviada-de-](https://www.pearsonclinical.com.br/escala-wechsler-abreviada-de-inteligencia-wasi-kit.html)  
482 [inteligencia-wasi-kit.html](https://www.pearsonclinical.com.br/escala-wechsler-abreviada-de-inteligencia-wasi-kit.html)
- 483 19. Solot CB, Knightly C, Handler SD, Gerdes M, McDonald-McGinn DM, Moss  
484 E, et al. Communication disorders in the 22Q11.2 microdeletion syndrome.  
485 *J Commun Disord.* 2000;33(3):187–203; quiz 203–4.
- 486 20. Antshel KM, Stallone K, AbdulSabur N, Shprintzen R, Roizen N, Higgins  
487 AM, et al. Temperament in velocardiofacial syndrome. *J Intellect Disabil*  
488 *Res.* 2007;51(3):218–27.
- 489 21. Tang KL, Antshel KM, Fremont WP, Kates WR. Behavioral and Psychiatric  
490 Phenotypes in 22q11.2 Deletion Syndrome. *J Dev Behav Pediatr.*  
491 2015;36(8):639–50.
- 492 22. Franchini M, Schaer M, Glaser B, Kott-Radecka M, Debanné M, Schneider  
493 M, et al. Visual processing of emotional dynamic faces in 22q11.2 deletion

- 494 syndrome: Visual processing of emotional dynamic faces in 22q11DS. *J*  
495 *Intellect Disabil Res.* 2016;60(4):308–21.
- 496 23. Glaser B, Mumme DL, Blasey C, Morris MA, Dahoun SP, Antonarakis SE,  
497 et al. Language skills in children with velocardiofacial syndrome (deletion  
498 22q11.2). *J Pediatr.* 2002;140(6):753–8.
- 499 24. Niarchou M, Zammit S, van Goozen SHM, Thapar A, Tierling HM, Owen  
500 MJ, et al. Psychopathology and cognition in children with 22q11.2 deletion  
501 syndrome. *Br J Psychiatry.* 2014;204(1):46–54.
- 502 25. Duijff SN, Klaassen PWJ, Swanenburg de Veye HFN, Beemer FA,  
503 Sinnema G, Vorstman JAS. Cognitive and behavioral trajectories in  
504 22q11DS from childhood into adolescence: A prospective 6-year follow-up  
505 study. *Res Dev Disabil.* 2013;34(9):2937–45.
- 506 26. Green T, Gothelf D, Glaser B, Debbane M, Frisch A, Kotler M, et al.  
507 Psychiatric disorders and intellectual functioning throughout development  
508 in velocardiofacial (22q11.2 deletion) syndrome. *J Am Acad Child Adolesc*  
509 *Psychiatry.* 2009;48(11):1060–8.
- 510 27. Swillen A, McDonald-McGinn D. Developmental trajectories in 22q11.2  
511 deletion syndrome. *Am J Med Genet C Semin Med Genet.*  
512 2015;169(2):172–81.
- 513 28. Amelsvoort T. Cognitive deficits associated with schizophrenia in velo-  
514 cardio-facial syndrome. *Schizophr Res.* 2004;70(2–3):223–32.
- 515 29. McCROSKEY JC, Richmond VP, Daly JA, Falcione RL. STUDIES OF THE  
516 RELATIONSHIP BETWEEN COMMUNICATION APPREHENSION AND  
517 SELF-ESTEEM. *Hum Commun Res.* 1977;3(3):269–77.
- 518 30. Beitchman JH, Wilson B, Johnson CJ, Atkinson L, Young A, Adlaf E, et al.  
519 Fourteen-Year Follow-up of Speech/Language-Impaired and Control  
520 Children: Psychiatric Outcome. *J Am Acad Child Adolesc Psychiatry.*  
521 2001;40(1):75–82.

522

523

524

525

526

## 22q11.2del

### Structure and Function Impairment

Structure of nose  
Structure of pharynx  
Intellectual functions  
Temperament and personality functions  
Thought functions  
Articulation functions  
Fluency and rhythm of speech functions

### Activity Limitation and Participation Restriction

Learning to read  
Learning to write  
Focusing attention  
Thinking  
Reading  
Writing  
Solving problems  
Making decisions  
Undertaking a single task  
Undertaking multiple tasks  
Community life

Handling stress and other psych  
Communicating with - receiving - spoken messages  
Communicating with - receiving - written messages  
Producing nonverbal messages  
Producing messages in formal sign language  
Producing messages in formal sign language  
Conversation  
Discussion  
Complex interpersonal interactions  
Informal education

### Environmental factors - facilitator

Immediate family  
Extended family  
Acquaintances, peers colleagues, neighbours and community members  
Personal care providers and personal assistants  
Health professionals  
Health-related professionals

Utilities services, systems and policies  
Communication services, systems and policies  
Transportation services, systems and policies  
Associations and organizational services, systems and policies  
Media services, systems and policies  
Health services, systems and policies
